1 **Genetic relatedness cannot explain social bonds in black-and-white ruffed**  
2 **lemurs (*Varecia variegata*).**

3

4 Andrea L. Baden<sup>1,2,3\*</sup>, Timothy H. Webster<sup>4\*</sup>, Brenda J. Bradley<sup>5</sup>

5

6 <sup>1</sup>Department of Anthropology, Hunter College, New York, NY 10065

7 <sup>2</sup>The Graduate Center of the City University of New York, New York, NY 10065

8 <sup>3</sup>The New York Consortium in Evolutionary Primatology (NYCEP)

9 <sup>4</sup>Department of Anthropology, University of Utah, Salt Lake City, UT 84112

10 <sup>5</sup> Department of Anthropology, The George Washington University, Washington

11 DC

12

13 \*Corresponding authors: Andrea L. Baden, [andrea.baden@hunter.cuny.edu](mailto:andrea.baden@hunter.cuny.edu),

14 Hunter College, Department of Anthropology, 695 Park Avenue, New York, NY

15 10065, +001-212-396-6818; Timothy H. Webster, [timothy.h.webster@utah.edu](mailto:timothy.h.webster@utah.edu),

16 Department of Anthropology, University of Utah, 260 S Central Drive, Carolyn and

17 Kem Gardner Commons, Suite 4625, Salt Lake City, UT 84112

18

19 Word count: 8,258

20

21 **ABSTRACT**

22           Several primates exhibit fission-fusion social dynamics, yet the factors  
23 shaping variable associations among subgroup members have not been widely  
24 addressed. Associations may occur simply because of shared habitat preferences;  
25 however, social ties may also be influenced by genetic relatedness (kinship) or  
26 social attraction. Here, we investigate the association patterns of wild black-and-  
27 white ruffed lemurs, *Varecia variegata*, in Ranomafana National Park, Madagascar  
28 using behavioural, spatial (home range), and genetic data from twenty-four  
29 individually identified animals. We collected 40,840 records of group composition  
30 over a 17-month period and from this calculated pairwise association indices. We  
31 also used ranging coordinates and genetic samples to estimate patterns of spatial  
32 overlap and kinship, and then related these measures to patterns of affiliation using  
33 Mantel tests and MRQAP. From these analyses, we found that dyadic ruffed lemur  
34 social associations were generally sparse and weak; that home range overlap was  
35 minimal; and that average relatedness within the community was low. We found  
36 no evidence that kinship was related to patterns of either spatial overlap or social  
37 association; instead, associations were primarily driven by space use. While home  
38 range overlap explained most of the variation seen in social association, some  
39 variation remains unaccounted for, suggesting that other social, ecological, and  
40 biological factors such as shared resource defense or communal breeding might  
41 also play a role in social attraction among members of this species.

42

43 *Keywords:* social network analysis, range use, spatial overlap, Association Index,  
44 kinship, fission-fusion, microsatellites, primates

45

## 46 **INTRODUCTION**

47 Animal social systems reflect non-random relationships among  
48 neighbouring conspecifics, the content, quality, and patterning of which define their  
49 social structure (Hinde, 1976). In fact, there is growing evidence that taxa as  
50 diverse as fishes, lizards, birds, cetaceans, and equids exhibit social associations  
51 that are not only non-random, but highly structured (Augusto, Frasier, &  
52 Whitehead, 2017; Croft et al., 2012, 2005; Firth et al., 2017; Spiegel, Sih, Leu, &  
53 Bull, 2018; Stanley, Mettke-Hofmann, Hager, & Shultz, 2018). Individuals vary in  
54 the numbers, strengths, and stabilities of their social ties (Croft et al., 2005;  
55 McDonald, 2007; Silk, Alberts, & Altmann, 2006; Silk, Altmann, & Alberts, 2006;  
56 Silk et al., 2010a; Stanley et al., 2018), as well as in their preferences for social  
57 associates (e.g., Cords, 2002; Gero, Gordon, & Whitehead, 2015; Kohn, Meredith,  
58 Magdaleno, King, & West, 2015; Mourier, Vercelloni, & Planes, 2012; Perry, 2012;  
59 Schülke, Bhagavatula, Vigilant, & Ostner, 2010)—outcomes of which can be  
60 evolutionarily significant (Seyfarth & Cheney, 2012; Silk, 2007). For example, the  
61 extent and/or strength of females' social connections have been positively linked  
62 to higher fertility (*Macaca mulatta*: Brent et al., 2013; humans: Balbo & Barban,  
63 2014), longer lifespan (*Papio cynocephalus*: Alberts, 2019; Archie, Tung, Clark,  
64 Altmann, & Alberts, 2014; *Papio ursinus*: Silk et al., 2010b), and greater offspring  
65 survival (*Equus caballus*: Cameron, Setsaas, & Linklater, 2009; *Papio*

66 *cynocephalus*: Silk, Alberts, & Altmann, 2003; *Papio ursinus*: Cheney, Silk, &  
67 Seyfarth, 2016; Silk et al., 2009; *Physeter microcephalus*: Whitehead, 1996).  
68 Similarly, males that form strong social bonds have been shown to be more  
69 successful at forming coalitions, achieving high rank, and siring more offspring  
70 than males with weaker social bonds (e.g., *Chiroxiphia linearis*: McDonald, 2007;  
71 *Macaca assamensis*: Schülke et al., 2010; *Pan troglodytes*: Gilby et al., 2013).  
72 Nevertheless, while the long-term health and fitness outcomes of social bonds  
73 have been the focus of much investigation, the proximate factors shaping social  
74 preferences have received comparatively little attention.

75         Several hypotheses have been proposed to explain social preference, the  
76 most popular being kinship, whereby group members show preferential  
77 associations with and, in the case of kin selection, are more likely to direct costly  
78 altruistic behaviours toward close genetic relatives (Hamilton, 1964). For instance,  
79 many female mammals exhibit social preferences toward maternal kin (Smith,  
80 2014), a pattern observed in primates in particular (reviewed in Langergraber,  
81 2012), but also in spotted hyaenas (Wahaj et al., 2004), African elephants (Archie,  
82 Moss, & Alberts, 2006), dolphins (Frère et al., 2010), and mountain goats (Godde,  
83 Côté, & Réale, 2015), among others. Social preferences toward kin can be driven  
84 by the benefits of associating with relatives, such as allomaternal care (reviewed  
85 in Briga, Pen, & Wright, 2012; Pope, 2000; and in some cases even brood  
86 parasitism, Andersson, 2017), reduced aggression and infanticide risk (reviewed  
87 in Brown & Brown, 1996; Agrell, Wolff, & Ylonen, 1998), foraging advantages  
88 (Griffiths & Armstrong, 2002; Nystrand, 2007), and shared social and ecological

89 knowledge (McComb, Moss, Durant, Baker, & Sayialel, 2001; Salpeteur et al.,  
90 2015). However, social integration has also been shown to have strong direct  
91 fitness consequences between nonrelatives (Baden, Wright, Louis, & Bradley,  
92 2013; Cameron et al., 2009; G. G. Carter & Wilkinson, 2015; Riehl, 2011),  
93 suggesting that social bonds can evolve based on these direct benefits alone.  
94 Moreover, evidence for kin-biased relationships in other species, particularly those  
95 with higher fission-fusion dynamics, is weak (e.g., Best, Dwyer, Seddon, &  
96 Goldizen, 2014; K. D. Carter, Seddon, Frère, Carter, & Goldizen, 2013; Hirsch,  
97 Prange, Hauver, & Gehrt, 2013; Langergraber, Mitani, & Vigilant, 2007, 2009;  
98 Moscovice et al., 2017; Wilkinson, Carter, Bohn, & Adams, 2016), raising  
99 questions as to the ubiquity of kinship in the formation and maintenance of social  
100 ties.

101         One complicating factor in determining whether and how kinship shapes  
102 social bonds is that it can be difficult to decouple social associations due to kinship  
103 from associations due to other social and spatial contexts (reviewed in Doreian &  
104 Conti, 2012; Wey, Blumstein, Shen, & Jordán, 2008). For example, in some  
105 species it is difficult to differentiate whether strong associations are due to strong  
106 genetic ties or to other factors, such as sex or age (Lusseau & Newman, 2004;  
107 Mourier et al., 2012), habitat utilization (Wiszniewski, Allen, & Möller, 2009), or  
108 foraging specializations (Daura-Jorge, Cantor, Ingram, Lusseau, & Simões-Lopes,  
109 2012; Gilby & Wrangham, 2008; Griffiths & Armstrong, 2002; Mitani, Merriwether,  
110 & Zhang, 2000). Indeed, patterns of social association have been found to  
111 correlate with spatial overlap (i.e., overlapping home ranges) more strongly than,

112 or to the exclusion of, kinship in a number of species (Best et al., 2014; K. D. Carter  
113 et al., 2013; Frère et al., 2010; Strickland, Gardiner, Schultz, & Frère, 2014).  
114 Moreover, although individuals living in closer physical proximity are more prone  
115 to interact (e.g., Clutton-Brock, 1989; Kossinets & Watts, 2006), conspecifics with  
116 high levels of spatial overlap may also mediate their interactions by temporally  
117 modifying range use, such that animals with highly overlapping ranges may  
118 interact minimally, if at all (e.g., temporal avoidance) (Leu, Bashford, Kappeler, &  
119 Bull, 2010; Ramos-Fernández, Boyer, Aureli, & Vick, 2009; Strickland et al., 2017).  
120 While still rare, studies that consider the simultaneous effects of spatial overlap  
121 and kinship on association patterns are thus important to understanding the role  
122 of social preference in the evolution of social systems and sociality (e.g., Best et  
123 al., 2014; K. D. Carter et al., 2013; Frère et al., 2010; Lusseau et al., 2006; Maher,  
124 2009; Podgórski, Lusseau, Scandura, Sönnichsen, & Jędrzejewska, 2014;  
125 Strickland et al., 2014).

126 Ruffed lemurs (Genus *Varecia*) are moderately-sized frugivores (Baden,  
127 Brenneman, & Louis Jr., 2008; Balko & Underwood, 2005) that live in groups  
128 (hereafter “communities”) comprising as many as 30 adult and subadult individuals  
129 and their offspring (Baden, Webster, & Kamilar, 2016 and references therein).  
130 From earlier work, we know that communities exhibit high fission-fusion dynamics,  
131 with members varying in their degrees of home range overlap and number and  
132 strength of social ties (Baden, 2011; Baden & Gerber, n.d.; Baden et al., 2016;  
133 Vasey, 2006). Moreover, studies of microsatellite markers and mitochondrial DNA  
134 have shown that while average pairwise relatedness within communities is low

135 (i.e., both sexes disperse: Baden et al., 2014), communities nevertheless contain  
136 networks of closely related kin (e.g, Baden, 2011; Baden et al., 2013). Taken  
137 together, these lines of evidence suggest that community members may be  
138 actively choosing social associates, and that these associations may be shaped  
139 by a number of ecological, social, and biological factors. Here, we investigate the  
140 relative influences of space use and kinship on the strength of associations  
141 amongst members of a black-and-white ruffed lemur (*Varecia variegata*)  
142 community. Specifically, we quantify dyadic measures of association, home range  
143 overlap, and genetic relatedness to address the overarching question: What  
144 influences social association in ruffed lemurs?

145

## 146 **METHODS**

### 147 **Study site and subjects**

148 We collected data from one *V. variegata* community at Mangevo [21°220  
149 6000 S, 47°280 000 E], a mid-elevation (660-1,200 m) primary rainforest site  
150 located in the southeastern parcel of Ranomafana National Park, Madagascar  
151 (Wright et al., 2012) during 16 months of study (August–December 2007;  
152 February– December 2008). At the time of the study, the community included 24  
153 adults and subadults (8 adult females, 11 adult males, 5 subadult males). All  
154 individuals in this study were habituated and individually identified via radio-collars  
155 or unique collar-tag combinations prior to behavioural observations (see Baden et  
156 al., 2016 for specific details). Animals were collared under veterinary supervision  
157 following a strict protocol (Glander, 1993). Nineteen infants were born in the 2008

158 birth season and were present from October to December 2008, when the study  
159 ended. Sampling efforts resulted in a total of 4,044 focal observation hours.

160

### 161 **Ethical note**

162       Permission to conduct research was granted by Madagascar's National  
163 Parks (ANGAP/MNP, #084/07-041/08), and research protocols were in  
164 compliance with Stony Brook University IACUC #2005-20081449. All animal  
165 protocols followed the Guidelines for the treatment of animals for teaching and  
166 research recommended by ASAB/ABS (2019).

167

168

### 169 **Data collection**

#### 170 *Behavioural monitoring*

171       We collected data during dawn to dusk follows of focal individuals. We  
172 located focal subjects at the beginning of each observation period via radio-  
173 telemetry and selected new subjects daily. We never sampled focal subjects on  
174 consecutive days and every effort was made to follow all subjects at least once per  
175 month. If an individual with a collar-tag was located in association with a radio-  
176 collared focal individual prior to 10:00 h, this individual became the new focal  
177 subject for that observation period. Observational periods ranged in duration  
178 between 8 to 11 hours depending on seasonal differences in day length and time  
179 needed to locate animals at dawn.



180           Upon initial contact with the focal individual, we recorded the number and  
181 identities of all other individuals present within the subgroup. To do so, one  
182 observer remained with the focal individual while the remaining three team  
183 members spread out to locate and identify all other members of the subgroup. *A*  
184 *priori*, individuals were considered members of a subgroup only if they were within  
185 50 m of the group center and were seen associating, traveling with and maintaining  
186 proximity to members of the subgroup being followed (see Baden et al., 2016 for  
187 details). After initial contact, we monitored subsequent changes in subgroup size,  
188 composition (age/sex class, individual identity), and cohesion (i.e., the greatest  
189 distance between any two subgroup members), as well as activity state of the focal  
190 subject using instantaneous scan sampling techniques collected at 5 min intervals  
191 (Altmann, 1974). We recorded a total of 40,840 group scans.

192           We collected simultaneous GPS coordinates at 10-min intervals from as  
193 close to the focal individual as possible to document daily individual range use. We  
194 recorded spatial coordinates only if estimated positional error was less than 10 m.

195

#### 196 *Genetic sampling*

197           In addition, we collected genetic samples from 38 black-and-white ruffed  
198 lemurs from the Mangevo population, including all subjects in this study, during  
199 five capture seasons spanning four consecutive years (2005-2008; see Baden,  
200 2011 for details). Sample collection occurred under veterinary supervision and  
201 followed a strict protocol outlined by Glander (1993). All capture procedures

202 occurred during non-reproductive seasons in the absence of infants and  
203 dependent offspring.

204 For each individual captured, one of us (ALB) collected approximately 1  
205 ml/kg of whole blood (~4 cc) from the femoral vein and four 2mm tissue biopsies  
206 from ear pinnae. All samples were stored in 5ml of lysis buffer solution (0.1 M Tris-  
207 HCl pH, 8.0, 0.1 M EDTA, 0.01 M NaCl, and 0.5% w/v SDS) at ambient  
208 temperature in the field (7 to 21 days) (Longmire, Gee, Hardekopf, Graham, &  
209 Mark, 1992). We then banked samples in a -80°C freezer at the Madagascar  
210 Biodiversity Partnership headquarters in Antananarivo, Madagascar and  
211 subsequently at the Yale Molecular Anthropology Lab in New Haven, CT until  
212 analysis.

213

## 214 **Data analysis**

### 215 *Association strength*

216 Sampling was biased toward radio-collared females; we therefore  
217 subsampled our data prior to association analyses. Details are presented in Baden  
218 et al. (2016), but briefly, we divided our dataset into monthly periods and according  
219 to the sex of the focal individual. Using only scans for which all individuals were  
220 known, we randomized point scans and selected X scans to include in the dataset  
221 for each sex, where X is 90% of the point scans for the sex with the fewest scans  
222 in a given month. This procedure resulted in the inclusion of a total of 11,784 point  
223 scans, with equal numbers of scans targeting male and female focal subjects in  
224 each month (Baden et al., 2016).

225 We used SOCPROG 2.9 (Whitehead, 2009) to calculate association indices  
226 between all pairs of individuals using the “simple ratio” index, which quantifies the  
227 proportion of time that two individuals are observed together relative to their total  
228 observation time overall. This index is appropriate when individuals are equally  
229 likely to be correctly identified (Cairns & Schwager, 1987; Ginsberg & Young, 1992;  
230 Whitehead, 2008), which is the case for this population. Given that subgroup  
231 composition in this community changes approximately every 90 minutes (Baden  
232 et al., 2016), we used a 6-hour sampling interval to reduce autocorrelation among  
233 periods. We also removed any subject observed in fewer than 10 sampling  
234 periods. Our final dataset included 8 adult females and 9 adult males observed in  
235 over 11,171 point scans.

236 To examine seasonal variation in associations, we organized the subsetted  
237 data from 2008 into three seasons according to female reproductive state as  
238 defined by Baden et al. (2013). Using the protocols described above, our final  
239 datasets included: 8 females and 9 males over 5,051 scans during the  
240 nonbreeding season (January through June); 7 females and 8 males over 3,267  
241 scans during the mating/gestation season (July through September); and 8  
242 females and 6 males over 2,664 scans during the birth/lactation season (October  
243 through December).

244

#### 245 *Spatial overlap*

246 We calculated home range overlap between all pairs of individuals using a  
247 utilization distribution overlap index (UDOI; Fieberg & Kochanny, 2005)

248 implemented in the R package *adehabitat* (Calenge, 2011), as described in Baden  
249 & Gerber (n.d.). The UDOI is an index of space-use sharing between two utilization  
250 distributions (UDs). UDOI values can range from 0 to 1, with a UDOI of 0 indicating  
251 no home range overlap and a UDOI of 1 indicating that home ranges are uniformly  
252 distributed and have 100% overlap. Values can also be  $>1$  if both UD are  
253 nonuniformly distributed and also have a high degree of overlap. Values  $<1$   
254 indicate less overlap relative to uniform space, whereas values  $>1$  indicate higher  
255 than normal overlap relative to uniform space. We calculated four UDOIs for all  
256 pairs of individuals: one annual UDOI, and three seasonal UDOIs according to  
257 female reproductive state, as for association analyses described above.

258

### 259 *Relatedness*

260 We genotyped individuals at a suite of 15 polymorphic microsatellite loci (see  
261 Baden, 2011 and Baden et al., 2014 for details). We extracted total genomic DNA  
262 from blood and/or tissue samples using standard nucleic acid extraction kits  
263 (QIAamp DNA Mini Kit; Qiagen) automated on a QiaCube (Qiagen). Extraction  
264 procedures followed the manufacturer's protocols, with the following modification  
265 to the tissue extraction procedures: samples were allowed to lyse initially in ASL  
266 buffer for 24-48 hours rather than 10 minutes.

267 We carried out PCR amplifications in a total reaction volume of 25  $\mu$ l  
268 consisting of 2  $\mu$ l template, 12.5  $\mu$ l Qiagen HotStar Taq Master Mix, and 10  $\mu$ M of  
269 each primer. Amplification conditions were as follows: initial denaturation at 95 °C  
270 for 15 min; 35 cycles of 30 s at 94 °C, 40 s at 54 to 60 °C (see Louis et al., 2005),

271 1 min at 72 °C, and a final extension of 7 min at 72 °C. The 5' end of the forward  
272 primer was fluorescently labeled, and amplification products were separated and  
273 visualized using capillary electrophoresis (ABI 3730xl Genetic Analyzer). We  
274 assessed allele sizes relative to an internal size standard (ROX-500) using Gene  
275 Mapper software (Applied Biosystems), and scored final genotypes based on  
276 multiple independent reactions (Taberlet, 1996). Panels yielded PIsib (Queller &  
277 Goodnight, 1989) values of  $2.7 \times 10^{-5}$ , demonstrating the very low probability that  
278 two individuals would share the same multilocus genotype by chance. We further  
279 tested the robusticity of this suite of loci for estimating relatedness with a  
280 rarefaction analysis as in Altmann & Alberts (1996) and de Ruiter & Geffen (1998)  
281 using the program RE-RAT (<http://people.musc.edu/~schwach/>). We estimated  
282 pairwise relatedness among individuals ( $r$ ) following Queller & Goodnight (1989) using  
283 the program GenAlEx 6.5 (Peakall & Smouse, 2012). Relatedness was based on allele  
284 frequencies derived from a larger population of 38 adult multilocus genotypes (Baden,  
285 2011). Fine scale dyadic relatedness assessments (e.g., distinguishing between  
286 full and half-sibs) are not possible in most microsatellite studies, and in fact, the  
287 ability to differentiate relatedness disjunctions on such a scale would probably  
288 require 30 to 60 microsatellite loci (Stone & Björklund, 2001). We therefore  
289 consider “related dyads” to be those with  $r$ -values  $\geq 0.25$ ; we made no attempt to  
290 further distinguish categories or degrees of relatedness.

291

292 *Correlations among association strengths, spatial overlap, and relatedness*

293 We used Mantel tests to examine whether association indices were related  
294 to either spatial overlap or relatedness, as well as test for a correlation between  
295 spatial overlap and relatedness (Mantel, 1967). We further used a multiple  
296 regression quadratic assignment procedure (MRQAP; Dekker, Krackhardt, &  
297 Snijders, 2007) to determine relationships between the response variable—  
298 association index—and predictor variables—sex, spatial overlap, and relatedness.  
299 For sex, we used a matrix of sex similarity, which used values of 1 (same sex) and  
300 0 (different sex). MRQAP tests each pairwise combination of response and  
301 predictor matrices while holding the remaining predictor matrices constant. We  
302 performed both Mantel tests and MRQAP for the overall dataset as well as in each  
303 of the three seasons using SOCPROG 2.9 (Whitehead, 2009).

304

305 *Quantifying relatedness among dyads with “preferred” association strengths or*  
306 *spatial overlap*

307 In addition to the correlations described above, we further investigated  
308 patterns of kinship among individuals identified as “preferred” associates (AIs) and  
309 those with “preferred” spatial overlap (UDOIs) following methods described in  
310 Frère et al. (2010) and Carter et al. (2013). We first divided relationships into  
311 “preferred” (>95<sup>th</sup> percentile of association indices or UDOIs) and “non-preferred”  
312 (<=95<sup>th</sup> percentile). Note that the descriptor “preferred” is clear for associates  
313 (dyads observed together more often than others), but dyads with high spatial  
314 overlap were not necessarily utilizing shared ranges in coordinated ways. Unlike  
315 Frère et al. (2010) and Carter et al. (2013), we did not include an ‘avoided’ category

316 because the number of dyads that did not associate and/or overlap spatially  
317 exceed the 5<sup>th</sup> percentile, which was used as a threshold in previous studies. We  
318 then calculated mean observed relatedness for each of the two categories  
319 (“preferred” and “non-preferred”) for both AI and UDOI datasets. Next, we  
320 randomly resampled relatedness values with replacement for each of the two  
321 datasets, using the sample sizes for each category in the empirical data (i.e.,  
322 sample sizes for “preferred” and “nonpreferred” were held constant). We repeated  
323 this procedure 10,000 times to generate a distribution, and then calculated  
324 significance as the fraction of replicates (out of 10,000) in which relatedness of  
325 “preferred” AI or UDOI was greater than the observed, empirical value. The script  
326 in which we implemented this procedure is available at  
327 [https://github.com/thw17/Varecia\\_social\\_preferences](https://github.com/thw17/Varecia_social_preferences).

328

## 329 **RESULTS**

### 330 *Association strength and spatial overlap*

331 The average overall association index (AI) was  $0.05 \pm 0.03$  (Baden et al.,  
332 2016). We observed similar mean AIs in each of the three reproductive seasons  
333 (nonbreeding =  $0.04 \pm 0.02$ ; mating/gestation =  $0.06 \pm 0.03$ ; birth/lactation =  $0.07$   
334  $\pm 0.03$ ). Within seasons, however, individuals varied substantially in their AIs.  
335 Average individual AIs varied from 0.01 to 0.11 (nonbreeding = 0.01-0.08;  
336 mating/gestation = 0.01-0.11; birth/lactation = 0.01-0.10), while maximum  
337 individual AIs ranged from 0.07 to 0.82 (nonbreeding = 0.08-0.82; mating/gestation  
338 = 0.07-0.79; birth/lactation = 0.08-0.82).

339 Average home range overlap (UDOI) was  $0.211 \pm 0.357$ . Some dyads did  
340 not overlap at all (UDOI = 0), while the maximum UDOI observed was 1.895  
341 (Figure 1). As with AIs, we observed similar mean UDOIs in each of the three  
342 reproductive seasons (nonbreeding =  $0.17 \pm 0.27$ ; mating/gestation =  $0.15 \pm 0.29$ ;  
343 birth/lactation =  $0.20 \pm 0.43$ ; Table 1)

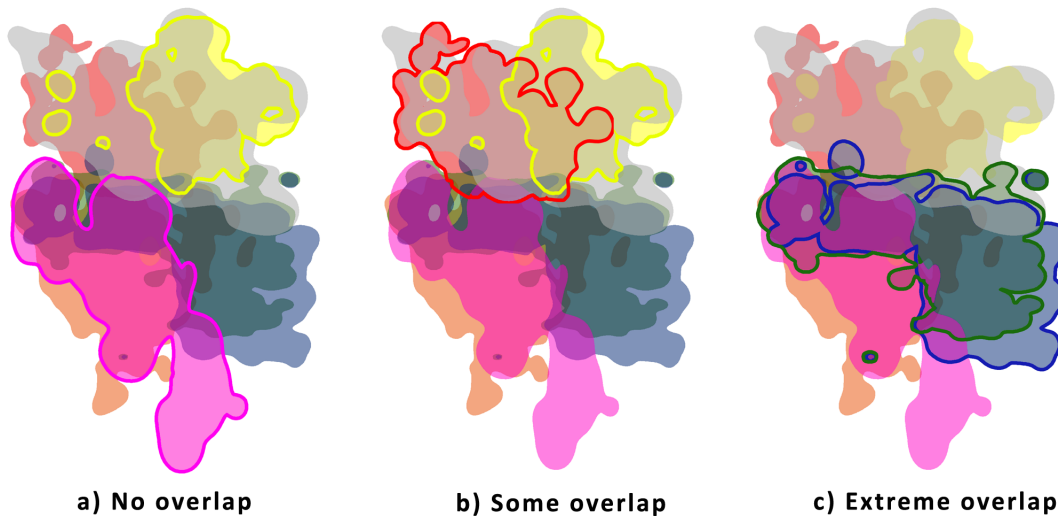

345 *Figure 1. Examples of home range overlap among pairs of individuals within the Mangevo ruffed lemur*  
346 *community: a) Females Pink-Yellow and Radio-Yellow have no spatial overlap among home ranges (i.e.,*  
347 *UDOI = 0.00), whereas b) females Radio-Yellow and Radio-Red and c) females Radio-Blue and Radio-Green*  
348 *share some (UDOI = 0.106) to nearly complete home range overlap (UDOI = 0.951), respectively.*

349

350



351 Table 1. Summary of association indices, utilization distribution overlap indices  
352 (UDOIs), and relatedness overall and by reproductive season.

353

| Association Indices | n   | Mean  | SD   | Min   | Max  |
|---------------------|-----|-------|------|-------|------|
| Overall             | 136 | 0.05  | 0.03 | 0.00  | 0.80 |
| Nonreproductive     | 136 | 0.04  | 0.12 | 0.00  | 0.82 |
| Mating/Gestation    | 105 | 0.06  | 0.13 | 0.00  | 0.79 |
| Birth/Lactation     | 91  | 0.07  | 0.15 | 0.00  | 0.82 |
| UDOIs               | n   | Mean  | SD   | Min   | Max  |
| Overall             | 136 | 0.21  | 0.36 | 0.00  | 1.90 |
| Nonreproductive     | 136 | 0.17  | 0.27 | 0.00  | 1.97 |
| Mating/Gestation    | 120 | 0.15  | 0.29 | 0.00  | 1.74 |
| Birth/Lactation     | 78  | 0.20  | 0.43 | 0.00  | 2.13 |
| Relatedness         | n   | Mean  | SD   | Min   | Max  |
| Overall             | 171 | -0.06 | 0.02 | -0.72 | 0.65 |
| Female-female       | 45  | -0.13 | 0.04 | -0.60 | 0.52 |
| Female-male         | 90  | -0.15 | 0.02 | -0.72 | 0.28 |
| Male-male           | 36  | -0.13 | 0.04 | -0.54 | 0.60 |

354

355

356 *Relatedness*

357 Genotypes were 93% complete; all subjects (n = 38) were scored for at least  
358 12 loci (average = 14, range = 12 to 15). Allelic richness was 4.33 and average  
359 observed heterozygosity was 0.400. There were no significant deviations from  
360 Hardy-Weinberg Equilibrium for any of the loci examined, nor was there evidence  
361 of null alleles.

362 Results of the rarefaction curve ( $y = 0.7991$ ,  $r^2 = 0.9992$ ) showed average  
363 relatedness values stabilizing after 5 loci, with the difference between mean  
364 relatedness using 5 and 6 loci changing by only 0.95% (0.023), and the difference  
365 between using 6 and 7 loci changing by only 0.56% (0.016). Thus, subsequent

366 dyadic  $r$ -value calculations included all possible dyads ( $n = 703$  dyads), as all  
367 individuals could be compared at 5 or more loci. Average pairwise relatedness  
368 among adults within the community was  $-0.06 \pm 0.02$  and ranged from  $-0.72$  to  
369  $0.65$  (Table 1; Figure 2).

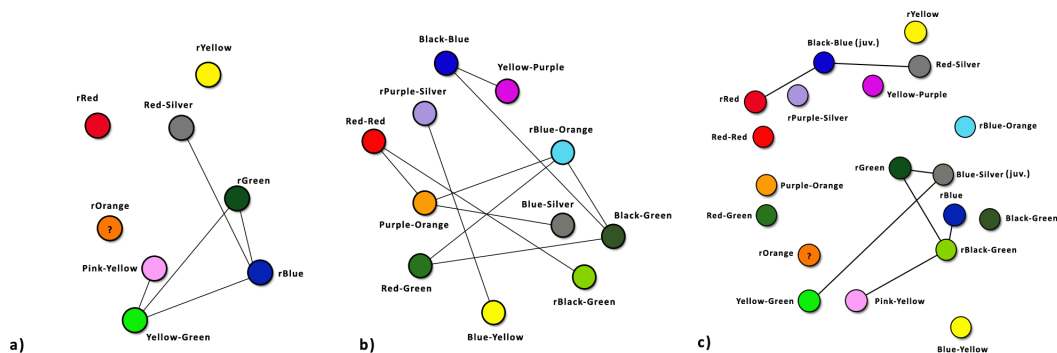

370

371 *Figure 2. Pairwise genetic relatedness ( $r \geq 0.25$ ) among a) female-female dyads, b) male-male dyads, and*  
372 *c) female-male dyads within the Mangevo social community. “?” indicates individuals for which genotype data*  
373 *are unavailable. Nodes are organized according to individual home range centroids.*

374

### 375 *Relationships between association strength, spatial overlap, and relatedness*

376 Using the full dataset, Mantel tests revealed that kinship was unrelated to  
377 either home range overlap (UDOI;  $n = 25$ ,  $r = 0.047$ ,  $p = 0.724$ ) or association  
378 indices (AI;  $n = 14$ ,  $r = 0.120$ ,  $p = 0.294$ ), whereas UDOI and AI were significantly  
379 correlated ( $n = 17$ ,  $r = 0.789$ ,  $p \ll 0.001$ ; Figure 3). This pattern held across all  
380 three reproductive seasons (Table 2). It is worth noting, however, that the  
381 correlation coefficient between UDOI and AI in the nonbreeding season was much  
382 lower, albeit still significantly positive, than the mating/gestation and birth/lactation  
383 seasons, which were very similar (Table 2). Similarly, when we used MRQAPs to  
384 jointly analyze the effects of UDOI, kinship, and sex on AI, in every time period we  
385 analyzed, the partial correlations between UDOI and AI were always significantly

386 positive, while kinship and sex were never significantly correlated with AI (Table  
387 3).

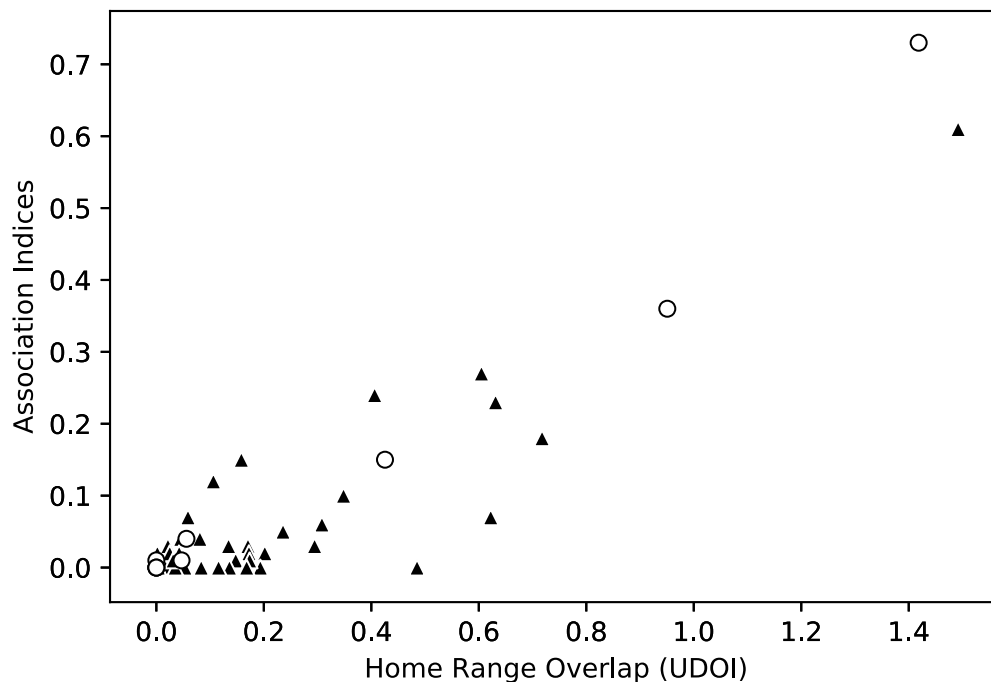

388

389 *Figure 3. Scatterplot illustrating the relationship between social association (AI) and home range overlap*  
390 *(UDOI). AIs range from 0 (no association) to 1 (100% association). Similarly, UDUIs range from 0 (no overlap)*  
391 *to 1 (complete overlap); values of >1 are possible if both UDUs are nonuniformly distributed and also have a*  
392 *high degree of overlap. Values <1 indicate less overlap relative to uniform space, whereas values >1 indicate*  
393 *higher than normal overlap relative to uniform space. White circles indicate kin ( $r \geq 0.25$ ); black triangles*  
394 *indicate non-kin ( $r < 0.25$ ).*

395

396

397 Table 2. Results from Mantel tests correlating Association Indices with utilization  
398 distribution overlap indices (UDOIs), and relatedness overall and by reproductive  
399 season.

400

| Season          | Variable    | Records | N  | Correlation | <i>p</i> -value |
|-----------------|-------------|---------|----|-------------|-----------------|
| Overall         | UDOI        | 11,171  | 17 | 0.789       | <<0.001         |
| Overall         | Relatedness | 11,171  | 14 | 0.120       | 0.294           |
| Mating          | UDOI        | 3,267   | 13 | 0.891       | <<0.001         |
| Mating          | Relatedness | 3,267   | 13 | 0.099       | 0.392           |
| Nonbreeding     | UDOI        | 5,051   | 14 | 0.566       | <<0.001         |
| Nonbreeding     | Relatedness | 5,051   | 14 | 0.149       | 0.184           |
| Birth/gestation | UDOI        | 2,664   | 11 | 0.892       | <<0.001         |
| Birth/gestation | Relatedness | 2,664   | 11 | 0.159       | 0.254           |

401 Note: Overall includes 2007-2008, whereas seasonal measures are from 2008  
402 only. N indicates the number of individuals included in each analysis; individuals  
403 had to be represented in both datasets in order to be included in the analyses for  
404 a given season.

405  
406

407

408 Table 3. Results from a multiple regression quadratic assignment procedure (MRQAP) investigating the partial relationships  
 409 of association (AI) with utilization distribution overlap indices (UDOI), relatedness, and sex.

| Season           | N  | UDOI         |                 | Relatedness  |                 | Sex          |                 |
|------------------|----|--------------|-----------------|--------------|-----------------|--------------|-----------------|
|                  |    | Partial corr | <i>p</i> -value | Partial corr | <i>p</i> -value | Partial corr | <i>p</i> -value |
| Overall          | 14 | 0.920        | <<0.001         | 0.035        | 0.754           | 0.056        | 0.617           |
| Nonbreeding      | 11 | 0.655        | <<0.001         | 0.123        | 0.356           | -0.113       | 0.460           |
| Mating/gestation | 10 | 0.873        | <<0.001         | -0.049       | 0.742           | 0.281        | 0.720           |
| Birth/lactation  | 8  | 0.941        | <<0.001         | 0.296        | 0.144           | 0.102        | 0.530           |

410

411

412 *Relatedness among dyads with “preferred” association strengths or spatial overlap*

413 Average relatedness among “preferred” dyads, defined as falling in the  
414 >95<sup>th</sup> percentile of AIs (5 of 91 dyads), was significantly higher than among dyads  
415 classified as “not preferred” (mean  $R_{xAI\_preferred} = 0.109$  versus mean  $R_{xAI\_non-preferred}$   
416  $= -0.095$ ;  $p = 0.049$ ). In contrast, average relatedness of dyads with the greatest  
417 home range overlap, defined as falling in the >95<sup>th</sup> percentile of UDOI (10 of 190  
418 dyads), was not statistically different from other dyads (mean  $R_{xUDOI\_preferred} = -$   
419  $0.015326$  versus mean  $R_{xUDOI\_non-preferred} = -0.03464$ ,  $p = 0.3978$ ).

420

## 421 **Discussion**

422 Results from this study illustrate complex relationships among social  
423 association, space use, and kinship in wild black-and-white ruffed lemurs, patterns  
424 that—while unusual for primates—are well aligned with much of the broader  
425 mammalian literature. We found that ruffed lemur social associations varied  
426 immensely, ranging from no association between some individuals to dyads  
427 observed together more than 75% of the time. From a community perspective, the  
428 social network was sparse, with weak associations (AIs) being common. Similarly,  
429 home range overlap was minimal and average relatedness among community  
430 members was low. These patterns were consistent throughout the year and across  
431 reproductive seasons. Together, these and earlier lines of evidence (e.g., Baden,  
432 2011; Baden et al., 2016) can be used to characterize ruffed lemurs as having a

433 spatiotemporally dispersed fission-fusion social organization with weak social and  
434 kinship ties.

435 Kin selection theory (Hamilton, 1964) has long been invoked to explain the  
436 social preferences observed among mammals (e.g., Archie et al., 2006; Frère et  
437 al., 2010; Godde et al., 2015; Smith, 2014; Wahaj et al., 2004), particularly in  
438 primates (reviewed in Langergraber, 2012; Silk, 2002). In this study, however, we  
439 found no evidence that kinship structured either spatial overlap or social  
440 association overall in the community. There were exceptions, however, as some,  
441 but not all, of the very closest social relationships were between closely related  
442 individuals. The closest social ties in the community appear to occur primarily  
443 between females and their preferred (often unrelated male) social partners,  
444 followed by mothers and their pre-dispersal-aged subadult and adult offspring.  
445 Nevertheless, although fewer than ten percent (8.8%) of adults within the  
446 community were genetic relatives, nearly three-quarters of adult females (71%)  
447 and all of adult males (100%) were closely related to at least one, and up to as  
448 many as three other same-sex relative(s) within the community. Thus, while overall  
449 patterns of dyadic relatedness suggest that ruffed lemur communities are  
450 composed of both kin and non-kin, and that preferred associates are sometimes  
451 close relatives, related dyads are not forming spatial networks of kin within the  
452 larger communal range. These patterns contrast with the spatially structured  
453 matrilineal communities described in *Microcebus murinus* (Eberle & Kappeler, 2006; Radespiel,  
454 Lutermann, Schmelting, Bruford, & Zimmermann, 2003), another communally  
455 breeding strepsirrhine. Some authors have used this model to hypothesize that, at

456 least in part, kin networks have facilitated the evolution of cooperative infant care  
457 (Eberle & Kappeler, 2006). That kin networks don't exist in ruffed lemurs, who also  
458 engage in cooperative infant care (Baden et al., 2013), further highlights the  
459 uniqueness of their communal breeding strategies.

460         These results build on growing evidence that spatial overlap is more  
461 strongly associated with social association than kinship in many taxa characterized  
462 by high fission-fusion dynamics (Best et al., 2014; K. D. Carter et al., 2013; Frère  
463 et al., 2010; Strickland et al., 2014). Importantly, not all dyads with a high degree  
464 of home range overlap were close social associates. Indeed, many dyads with  
465 nonzero spatial overlap were never observed together. Similar patterns have been  
466 observed in dolphins, giraffes, and water dragons, wherein subjects did not  
467 associate, despite sharing complete or near complete home range overlap (i.e.,  
468 'social avoidance' in dolphins: Frère et al., 2010; giraffes: K. D. Carter et al., 2013;  
469 water dragons: Strickland et al., 2014). Thus, spatial overlap does not necessitate  
470 social association. Instead, these results raise important questions related to  
471 causation. What motivates social association? Are individuals that bias their time  
472 toward overlapping areas simply more likely to associate? Or, in cases where  
473 patterns of spatial overlap and social association do not align, is there some  
474 additional force shaping these spatial and social decisions? Evaluating these  
475 alternatives requires further investigation.

476         Moreover, while home range overlap explained most of the variation seen  
477 in social association in ruffed lemurs, some variation remains unaccounted for,  
478 suggesting that other social, ecological, and biological factors must also be at play.



479 One possibility is that even weak or infrequent social associations may facilitate  
480 cooperative resource defense against other frugivorous competitors. For instance,  
481 ruffed lemurs actively defend fruit-bearing trees against larger brown lemur (Genus  
482 *Eulemur*) groups for days or even weeks during the resource scarce austral winter  
483 (Baden, personal observation). Perhaps social association during these times  
484 better equips otherwise solitary individuals to defend valuable fruit resources  
485 against interspecific competitors. If this was the case, one might expect higher Als  
486 during resource scarce seasons, periods that correspond primarily with  
487 mating/gestation, but also birth/lactation seasons. Als were lowest in the  
488 nonbreeding, resource abundant periods, though not significantly so, lending  
489 minimal support for this hypothesis. In addition, communal breeding plays an  
490 important role in female reproductive success in this species (Baden et al., 2013)  
491 and might also be important in driving social preferences. For instance, recent work  
492 suggests social networks in guppies may be structured by the propensity for non-  
493 kin to cooperate (Croft et al., 2009), which could lead to the maintenance of  
494 cooperation in the absence of kin assortment (Fletcher & Doebeli, 2009). These  
495 lines of research offer exciting opportunities to better understand the myriad factors  
496 shaping social preferences in fission-fusion species.

497

#### 498 **Acknowledgements**

499 Research would not have been possible without the logistical support of The  
500 Institute for the Conservation of Tropical Environments (ICTE), MICET and Centre  
501 ValBio, or permission from ANGAP/Madagascar's National Parks. Drs. Randy

502 Junge, Felicia Knightly, Angie Simai, Edward E. Louis, Jr., and staff of the  
503 Madagascar Biodiversity Project provided invaluable assistance during capture  
504 procedures. Solo Justin, Telo Albert, Lahitsara Pierre, Razafindrakoto Georges,  
505 Leroa, Velomaro, Reycheil Chadwick, Lindsay Dytham, and A.J. Lowin assisted  
506 with data collection and provided invaluable support and advice on the ground,  
507 while Gary Aronsen provided support in the Yale Molecular Anthropology Lab. We  
508 are further grateful for resources and support from the Center for High  
509 Performance Computing at the University of Utah. Funding was generously  
510 provided by National Science Foundation DDIG (BSC-0725975), the US  
511 Department of State Fulbright Fellowship, The Leakey Foundation, Primate  
512 Conservation, Inc., Conservation International's Primate Action Fund, Stony Brook  
513 University, Henry Doorly Zoo, and Yale University.

514

## 515 **References**

- 516 Agrell, J., Wolff, J. O., & Ylonen, H. (1998). Counter-strategies to infanticide in  
517 mammals: costs and consequences. *Oikos*, 83, 507–517.
- 518 Alberts, S. C. (2019). Social influences on survival and reproduction: Insights  
519 from a long-term study of wild baboons. *Journal of Animal Ecology*, 88(1),  
520 47–66. <https://doi.org/10.1111/1365-2656.12887>
- 521 Altmann, J. (1974). Observational Study of Behavior: Sampling Methods.  
522 *Behaviour*, 49(3), 227–267. <https://doi.org/10.1163/156853974X00534>
- 523 Altmann, J., & Alberts, S. (1996). Behavior predicts genes structure in a wild  
524 primate group. *Proceedings of the National Academy of Sciences of the*  
525 *United States of America*, 93(June), 5797–5801. Retrieved from  
526 <http://www.pnas.org/content/93/12/5797.short>
- 527 Andersson, M. (2017). Helping relatives survive and reproduce: inclusive fitness  
528 and reproductive value in brood parasitism. *American Naturalist*, 189(2),  
529 138–152. <https://doi.org/10.1086/689991>
- 530 Archie, E. A., Moss, C. J., & Alberts, S. C. (2006). The ties that bind: genetic  
531 relatedness predicts the fission and fusion of social groups in wild African  
532 elephants. *Proceeding of the Royal Society B*.  
533 <https://doi.org/10.1098/rspb.2005.3361>

- 534 Archie, E. A., Tung, J., Clark, M., Altmann, J., & Alberts, S. C. (2014). Social  
535 affiliation matters: Both same-sex and opposite-sex relationships predict  
536 survival in wild female baboons. *Proceedings of the Royal Society B:  
537 Biological Sciences*, 281(1793). <https://doi.org/10.1098/rspb.2014.1261>
- 538 Augusto, J. F., Frasier, T. R., & Whitehead, H. (2017). Social structure of long-  
539 finned pilot whales (*Globicephala melas*) off northern Cape Breton Island,  
540 Nova Scotia. *Behaviour*, 154(5), 509–540.  
541 <https://doi.org/10.1163/1568539X-00003432>
- 542 Baden, A. L. (2011). *Communal infant care in black-and-white ruffed lemurs*  
543 (*Varecia variegata*). *Ph.D Thesis*. Stony Brook University.
- 544 Baden, A. L., Brenneman, R. A., & Louis Jr., E. E. (2008). Morphometries of wild  
545 black-and-white ruffed lemurs [*Varecia variegata*; Kerr, 1792]. *American  
546 Journal of Primatology*, 70(10). <https://doi.org/10.1002/ajp.20583>
- 547 Baden, A. L., & Gerber, B. D. (n.d.). Spatial ecology of black-and-white ruffed  
548 lemurs (*Varecia variegata*) in southeastern Madagascar. *American Journal  
549 of Primatology*.
- 550 Baden, A. L., Holmes, S. M., Johnson, S. E., Engberg, S. E., Louis, E. E., &  
551 Bradley, B. J. (2014). Species-level view of population structure and gene  
552 flow for a critically endangered primate (*Varecia variegata*). *Ecology and  
553 Evolution*, 4(13). <https://doi.org/10.1002/ece3.1119>
- 554 Baden, A. L., Webster, T. H., & Kamilar, J. M. (2016). Resource seasonality and  
555 reproduction predict fission-fusion dynamics in black-and-white ruffed lemurs  
556 (*Varecia variegata*). *American Journal of Primatology*, 78(2), 256–279.  
557 <https://doi.org/10.1002/ajp.22507>
- 558 Baden, A. L., Wright, P. C., Louis, E. E., & Bradley, B. J. (2013). Communal  
559 nesting, kinship, and maternal success in a social primate. *Behavioral  
560 Ecology and Sociobiology*, 67(12), 1939–1950.  
561 <https://doi.org/10.1007/s00265-013-1601-y>
- 562 Balbo, N., & Barban, N. (2014). Does fertility behavior spread among friends?  
563 *American Sociological Review*, 79(3), 412–431.  
564 <https://doi.org/10.1177/0003122414531596>
- 565 Balko, E. A., & Underwood, H. B. (2005). Effects of forest structure and  
566 composition on food availability for *Varecia variegata* at Ranomafana  
567 National Park, Madagascar. *American Journal of Primatology*, 66(1), 45–70.  
568 <https://doi.org/10.1002/ajp.20127>
- 569 Best, E. C., Dwyer, R. G., Seddon, J. M., & Goldizen, A. W. (2014). Associations  
570 are more strongly correlated with space use than kinship in female eastern  
571 grey kangaroos. *Animal Behaviour*, 89, 1–10.  
572 <https://doi.org/10.1016/j.anbehav.2013.12.011>
- 573 Brent, L. J. N., Heilbronner, S. R., Horvath, J. E., Gonzalez-Martinez, J., Ruiz-  
574 Lambides, A., Robinson, A. G., ... Platt, M. L. (2013). Genetic origins of  
575 social networks in rhesus macaques. *Scientific Reports*, 3, 1–8.  
576 <https://doi.org/10.1038/srep01042>
- 577 Briga, M., Pen, I., & Wright, J. (2012). Care for kin: Within-group relatedness and  
578 allomaternal care are positively correlated and conserved throughout the  
579 mammalian phylogeny. *Biology Letters*, 8(4), 533–536.

- 580 <https://doi.org/10.1098/rsbl.2012.0159>
- 581 Brown, G. E., & Brown, J. A. (1996). Does kin-biased territorial behavior increase  
582 kin-biased foraging in juvenile salmonids? *Behavioral Ecology*, 7(1), 24–29.  
583 <https://doi.org/10.1093/beheco/7.1.24>
- 584 Cairns, S. J., & Schwager, S. J. (1987). A comparison of association indices.  
585 *Animal Behaviour*, 35(5), 1454–1469. [https://doi.org/10.1016/S0003-3472\(87\)80018-0](https://doi.org/10.1016/S0003-3472(87)80018-0)
- 586
- 587 Calenge, C. (2011). Home range estimation in R : the adehabitatHR package. *R*  
588 *Package*, 1–60. Retrieved from [http://cran.r-](http://cran.r-project.org/web/packages/adehabitatHR/vignettes/adehabitatHR.pdf)  
589 [project.org/web/packages/adehabitatHR/vignettes/adehabitatHR.pdf](http://cran.r-project.org/web/packages/adehabitatHR/vignettes/adehabitatHR.pdf)
- 590 Cameron, E. Z., Setsaas, T. H., & Linklater, W. L. (2009). Social bonds between  
591 unrelated females increase reproductive success in feral horses.  
592 *Proceedings of the National Academy of Sciences of the United States of*  
593 *America*, 106(33), 13850–13853. <https://doi.org/10.1073/pnas.0900639106>
- 594 Carter, G. G., & Wilkinson, G. S. (2015). Social benefits of non-kin food sharing  
595 by female vampire bats. *Proceedings of the Royal Society B: Biological*  
596 *Sciences*, 282(1819). <https://doi.org/10.1098/rspb.2015.2524>
- 597 Carter, K. D., Seddon, J. M., Frère, C. H., Carter, J. K., & Goldizen, A. W. (2013).  
598 Fission-fusion dynamics in wild giraffes may be driven by kinship, spatial  
599 overlap and individual social preferences. *Animal Behaviour*, 85(2), 385–  
600 394. <https://doi.org/10.1016/j.anbehav.2012.11.011>
- 601 Cheney, D. L., Silk, J. B., & Seyfarth, R. M. (2016). Network connections, dyadic  
602 bonds and fitness in wild female baboons. *Royal Society Open Science*,  
603 3(7). <https://doi.org/10.1098/rsos.160255>
- 604 Clutton-Brock, T. H. (1989). Mammalian mating systems. *Proceedings of the*  
605 *Royal Society of London. Series B. Biological Sciences*, 236(1285), 339–  
606 372. <https://doi.org/10.1098/rspb.1989.0027>
- 607 Cords, M. (2002). Friendship among adult female blue monkeys (*Cercopithecus*  
608 *mitis*). *Behaviour*, 139(2), 291–314.
- 609 Croft, D. P., Hamilton, P. B., Darden, S. K., Jacoby, D. M. P., James, R.,  
610 Bettaney, E. M., & Tyler, C. R. (2012). The role of relatedness in structuring  
611 the social network of a wild guppy population. *Oecologia*, 170(4), 955–963.  
612 <https://doi.org/10.1007/s00442-012-2379-8>
- 613 Croft, D. P., James, R., Ward, A. J. W., Botham, M. S., Mawdsley, D., & Krause,  
614 J. (2005). Assortative interactions and social networks in fish. *Oecologia*,  
615 143(2), 211–219. <https://doi.org/10.1007/s00442-004-1796-8>
- 616 Croft, D. P., Krause, J., Darden, S. K., Ramnarine, I. W., Faria, J. J., & James, R.  
617 (2009). Behavioural trait assortment in a social network: Patterns and  
618 implications. *Behavioral Ecology and Sociobiology*, 63(10), 1495–1503.  
619 <https://doi.org/10.1007/s00265-009-0802-x>
- 620 Daura-Jorge, F. G., Cantor, M., Ingram, S. N., Lusseau, D., & Simões-Lopes, P.  
621 C. (2012). The structure of a bottlenose dolphin society is coupled to a  
622 unique foraging cooperation with artisanal fishermen. *Biology Letters*, 8(5),  
623 702–705. <https://doi.org/10.1098/rsbl.2012.0174>
- 624 de Ruiter, J. R., & Geffen, E. (1998). Relatedness of matriline, dispersing males  
625 and social groups in long-tailed macaques (*Macaca fascicularis*).

- 626 *Proceedings of the Royal Society B: Biological Sciences*, 265, 79–87.  
627 <https://doi.org/10.1017/CBO9781107415324.004>
- 628 Dekker, D., Krackhardt, D., & Snijders, T. A. B. (2007). Sensitivity of MRQAP  
629 tests to collinearity and autocorrelation conditions. *Psychometrika*, 72(4),  
630 563–581. <https://doi.org/10.1007/s11336-007-9016-1>
- 631 Doreian, P., & Conti, N. (2012). Social context, spatial structure and social  
632 network structure. *Social Networks*, 34(1), 32–46.  
633 <https://doi.org/10.1016/j.socnet.2010.09.002>
- 634 Eberle, M., & Kappeler, P. M. (2006). Family insurance: Kin selection and  
635 cooperative breeding in a solitary primate (*Microcebus murinus*). *Behavioral*  
636 *Ecology and Sociobiology*, 60(4), 582–588. [https://doi.org/10.1007/s00265-](https://doi.org/10.1007/s00265-006-0203-3)  
637 [006-0203-3](https://doi.org/10.1007/s00265-006-0203-3)
- 638 Fieberg, J., & Kochanny, C. O. (2005). Quantifying home-range overlap: the  
639 importance of the utilization distribution. *The Journal of Wildlife*  
640 *Management*, 69(4), 1346–1359.
- 641 Firth, J. A., Voelkl, B., Crates, R. A., Aplin, L. M., Biro, D., Croft, D. P., &  
642 Sheldon, B. C. (2017). Wild birds respond to flockmate loss by increasing  
643 their social network associations to others. *Proceedings of the Royal Society*  
644 *B: Biological Sciences*, 284(1854). <https://doi.org/10.1098/rspb.2017.0299>
- 645 Fletcher, J. A., & Doebeli, M. (2009). A simple and general explanation for the  
646 evolution of altruism. *Proceedings of the Royal Society B: Biological*  
647 *Sciences*, 276(1654), 13–19. <https://doi.org/10.1098/rspb.2008.0829>
- 648 Frère, C. H., Krützen, M., Mann, J., Watson-Capps, J. J., Tsai, Y. J., Patterson,  
649 E. M., ... Sherwin, W. B. (2010). Home range overlap, matrilineal and  
650 biparental kinship drive female associations in bottlenose dolphins. *Animal*  
651 *Behaviour*, 80(3), 481–486. <https://doi.org/10.1016/j.anbehav.2010.06.007>
- 652 Gero, S., Gordon, J., & Whitehead, H. (2015). Individualized social preferences  
653 and long-term social fidelity between social units of sperm whales. *Animal*  
654 *Behaviour*, 102, 15–23. <https://doi.org/10.1016/j.anbehav.2015.01.008>
- 655 Gilby, I. C., Brent, L. J. N., Wroblewski, E. E., Rudicell, R. S., Hahn, B. H.,  
656 Goodall, J., & Pusey, A. E. (2013). Fitness benefits of coalitionary  
657 aggression in male chimpanzees. *Behavioral Ecology and Sociobiology*,  
658 67(3), 373–381. <https://doi.org/10.1007/s00265-012-1457-6>
- 659 Gilby, I. C., & Wrangham, R. W. (2008). Association patterns among wild  
660 chimpanzees (*Pan troglodytes schweinfurthii*) reflect sex differences in  
661 cooperation. *Behavioral Ecology and Sociobiology*, 62(11), 1831–1842.  
662 <https://doi.org/10.1007/s00265-008-0612-6>
- 663 Ginsberg, J. R., & Young, T. P. (1992). Measuring association between  
664 individuals or groups in behavioural studies. *Animal Behaviour*, 44(PART 2),  
665 377–379. [https://doi.org/10.1016/0003-3472\(92\)90042-8](https://doi.org/10.1016/0003-3472(92)90042-8)
- 666 Glander, K. E. (1993). Capture and marking techniques for arboreal primates. In  
667 A. Estrada, E. Rodriguez-Luna, R. Lopez-Wilchis, & R. Coates-Estrada  
668 (Eds.), *Estudios Primatológicos en Mexico, Vol. 1* (pp. 299–304).
- 669 Godde, S., Côté, S. D., & Réale, D. (2015). Female mountain goats, *Oreamnos*  
670 *americanus*, associate according to kinship and reproductive status. *Animal*  
671 *Behaviour*, 108, 101–107. <https://doi.org/10.1016/j.anbehav.2015.07.005>

- 672 Griffiths, S. W., & Armstrong, J. D. (2002). Kin-biased territory overlap and food  
673 sharing among Atlantic salmon juveniles. *Journal of Animal Ecology*, 71(3),  
674 480–486. <https://doi.org/10.1046/j.1365-2656.2002.00614.x>
- 675 Hamilton, W. D. (1964). The genetical evolution of social behaviour. I. *Journal of*  
676 *Theoretical Biology*, 7(1), 1–16. [https://doi.org/10.1016/0022-](https://doi.org/10.1016/0022-5193(64)90038-4)  
677 5193(64)90038-4
- 678 Hinde, R. A. (1976). Interactions, relationships and social structure. *Man*, 11(1),  
679 1–17.
- 680 Hirsch, B. T., Prange, S., Hauver, S. A., & Gehrt, S. D. (2013). Genetic  
681 relatedness does not predict racoon social network structure. *Animal*  
682 *Behaviour*, 85(2), 463–470. <https://doi.org/10.1016/j.anbehav.2012.12.011>
- 683 Kohn, G. M., Meredith, G. R., Magdaleno, F. R., King, A. P., & West, M. J.  
684 (2015). Sex differences in familiarity preferences within fission-fusion brown-  
685 headed cowbird, *Molothrus ater*, flocks. *Animal Behaviour*, 106, 137–143.  
686 <https://doi.org/10.1016/j.anbehav.2015.05.023>
- 687 Kossinets, G., & Watts, D. J. (2006). Empirical analysis of an evolving social  
688 network. *Science*, 311, 88–90. <https://doi.org/10.1126/science.1116869>
- 689 Langergraber, K. E. (2012). Kinship and cooperation in primates. In *The*  
690 *Evolution of Primate Societies* (pp. 491–513).
- 691 Langergraber, K. E., Mitani, J. C., & Vigilant, L. (2007). The limited impact of  
692 kinship on cooperation in wild chimpanzees. *Proceedings of the National*  
693 *Academy of Sciences*, 104(19), 7786–7790.  
694 <https://doi.org/10.1073/pnas.0611449104>
- 695 Langergraber, K. E., Mitani, J., & Vigilant, L. (2009). Kinship and social bonds in  
696 female chimpanzees (*Pan troglodytes*). *American Journal of Primatology*,  
697 71(10), 840–851. <https://doi.org/10.1002/ajp.20711>
- 698 Leu, S. T., Bashford, J., Kappeler, P. M., & Bull, C. M. (2010). Association  
699 networks reveal social organization in the sleepy lizard. *Animal Behaviour*,  
700 79(1), 217–225. <https://doi.org/10.1016/j.anbehav.2009.11.002>
- 701 Longmire, J. L., Gee, G. F., Hardekopf, C. L., Graham, A., & Mark, G. A. (1992).  
702 Establishing paternity in whooping cranes (*Grus americana*) by DNA  
703 analysis. *The Auk*, 109(3), 522–529.
- 704 Louis, E. E., Ratsimbazafy, J. H., Razakamaharao, V. R., Pierson, D. J., Barber,  
705 R. C., & Brenneman, R. A. (2005). Conservation genetics of black and white  
706 ruffed lemurs, *Varecia variegata*, from Southeastern Madagascar. *Animal*  
707 *Conservation*, 8(1), 105–111. <https://doi.org/10.1017/S1367943004001891>
- 708 Lusseau, D., & Newman, M. E. J. (2004). Identifying the role that animals play in  
709 their social networks. *Proceedings of the Royal Society B: Biological*  
710 *Sciences*, 271(SUPPL. 6), 477–481. <https://doi.org/10.1098/rsbl.2004.0225>
- 711 Lusseau, D., Wilson, B., Hammond, P. S., Grellier, K., Durban, J. W., Parsons, K.  
712 M., ... Thompson, P. M. (2006). Quantifying the influence of sociality on  
713 population structure in bottlenose dolphins. *Journal of Animal Ecology*,  
714 75(1), 14–24. <https://doi.org/10.1111/j.1365-2656.2005.01013.x>
- 715 Maher, C. R. (2009). Genetic relatedness and space use in a behaviorally flexible  
716 species of marmot, the woodchuck (*Marmota monax*). *Behavioral Ecology*  
717 *and Sociobiology*, 63(6), 857–868. <https://doi.org/10.1007/s00265-009-0726->

- 718 5  
719 Mantel, N. (1967). The Detection of Disease Clustering and a Generalized  
720 Regression Approach. *Cancer Research*, 27(2 Part 1), 209 LP – 220.  
721 Retrieved from  
722 [http://cancerres.aacrjournals.org/content/27/2\\_Part\\_1/209.abstract](http://cancerres.aacrjournals.org/content/27/2_Part_1/209.abstract)  
723 McComb, K., Moss, C., Durant, S. M., Baker, L., & Sayialel, S. (2001). Matriarchs  
724 as repositories of social knowledge in African elephants. *Science*, 292, 491–  
725 494. <https://doi.org/10.1126/science.1057895>  
726 McDonald, D. B. (2007). Predicting fate from early connectivity in a social  
727 network. *Proceedings of the National Academy of Sciences of the United*  
728 *States of America*, 104(26), 10910–10914.  
729 <https://doi.org/10.1073/pnas.0701159104>  
730 Mitani, J. C., Merriwether, D. A., & Zhang, C. (2000). Male affiliation, cooperation  
731 and kinship in wild chimpanzees. *Animal Behaviour*, 59(4), 885–893.  
732 <https://doi.org/10.1006/anbe.1999.1389>  
733 Moscovice, L. R., Douglas, P. H., Martinez-Iñigo, L., Surbeck, M., Vigilant, L., &  
734 Hohmann, G. (2017). Stable and fluctuating social preferences and  
735 implications for cooperation among female bonobos at LuiKotale, Salonga  
736 National Park, DRC. *American Journal of Physical Anthropology*, 163(1),  
737 158–172. <https://doi.org/10.1002/ajpa.23197>  
738 Mourier, J., Vercelloni, J., & Planes, S. (2012). Evidence of social communities in  
739 a spatially structured network of a free-ranging shark species. *Animal*  
740 *Behaviour*, 83(2), 389–401. <https://doi.org/10.1016/j.anbehav.2011.11.008>  
741 Nystrand, M. (2007). Associating with kin affects the trade-off between energy  
742 intake and exposure to predators in a social bird species. *Animal Behaviour*,  
743 74(3), 497–506. <https://doi.org/10.1016/j.anbehav.2006.11.031>  
744 Peakall, R., & Smouse, P. E. (2012). GenALEX 6.5: Genetic analysis in Excel.  
745 Population genetic software for teaching and research-an update.  
746 *Bioinformatics*, 28(19), 2537–2539.  
747 <https://doi.org/10.1093/bioinformatics/bts460>  
748 Perry, S. (2012). *The Behavior of Wild White-Faced Capuchins. Advances in the*  
749 *Study of Behavior* (1st ed., Vol. 44). Elsevier Inc.  
750 <https://doi.org/10.1016/b978-0-12-394288-3.00004-6>  
751 Podgórski, T., Lusseau, D., Scandura, M., Sönrichsen, L., & Jędrzejewska, B.  
752 (2014). Long-lasting, kin-directed female interactions in a spatially structured  
753 wild boar social network. *PLoS ONE*, 9(6), 1–11.  
754 <https://doi.org/10.1371/journal.pone.0099875>  
755 Pope, T. R. (2000). Reproductive success increases with degree of kinship in  
756 cooperative coalitions of female red howler monkeys (*Alouatta seniculus*).  
757 *Behavioral Ecology and Sociobiology*, 48(4), 253–267.  
758 <https://doi.org/10.1007/s002650000236>  
759 Queller, D. C., & Goodnight, K. F. (1989). Estimating relatedness using genetic  
760 markers. *Evolution*, 43(2), 258–275.  
761 Radespiel, U., Lutermann, H., Schmelting, B., Bruford, M. W., & Zimmermann, E.  
762 (2003). Patterns and dynamics of sex-biased dispersal in a nocturnal  
763 primate, the grey mouse lemur, *Microcebus murinus*. *Animal Behaviour*,

- 764 65(4), 709–719. <https://doi.org/10.1006/anbe.2003.2121>
- 765 Ramos-Fernández, G., Boyer, D., Aureli, F., & Vick, L. G. (2009). Association  
766 networks in spider monkeys (*Ateles geoffroyi*). *Behavioral Ecology and*  
767 *Sociobiology*, 63(7), 999–1013. <https://doi.org/10.1007/s00265-009-0719-4>
- 768 Riehl, C. (2011). Living with strangers: direct benefits favour non-kin cooperation  
769 in a communally nesting bird. *Proceedings of the Royal Society B: Biological*  
770 *Sciences*, 278(1712), 1728–1735. <https://doi.org/10.1098/rspb.2010.1752>
- 771 Salpeteur, M., Patel, H., Balbo, A. L., Rubio-Campillo, X., Madella, M.,  
772 Ajithprasad, P., & Reyes-García, V. (2015). When knowledge follows blood:  
773 Kin groups and the distribution of traditional ecological knowledge in a  
774 community of seminomadic pastoralists, Gujarat (India). *Current*  
775 *Anthropology*, 56(3), 471–483. <https://doi.org/10.1086/681006>
- 776 Schülke, O., Bhagavatula, J., Vigilant, L., & Ostner, J. (2010). Social bonds  
777 enhance reproductive success in male macaques. *Current Biology*, 20(24),  
778 2207–2210. <https://doi.org/10.1016/j.cub.2010.10.058>
- 779 Seyfarth, R. M., & Cheney, D. L. (2012). The Evolutionary Origins of Friendship.  
780 *Annual Review of Psychology*, 63(1), 153–177.  
781 <https://doi.org/10.1146/annurev-psych-120710-100337>
- 782 Silk, J. B. (2002). Kin selection in primate groups. *International Journal of*  
783 *Primatology*, 23(4), 849–875. <https://doi.org/10.1023/A:1015581016205>
- 784 Silk, J. B. (2007). The adaptive value of sociality in mammalian groups.  
785 *Philosophical Transactions of the Royal Society B: Biological Sciences*,  
786 362(1480), 539–559. <https://doi.org/10.1098/rstb.2006.1994>
- 787 Silk, J. B., Alberts, S. C., & Altmann, J. (2003). Social Bonds of Female Baboons  
788 Enhance Infant Survival. *Science*, 302, 1231–1234.  
789 <https://doi.org/10.1126/science.1088580>
- 790 Silk, J. B., Alberts, S. C., & Altmann, J. (2006). Social relationships among adult  
791 female baboons (*Papio cynocephalus*) II. Variation in the quality and stability  
792 of social bonds. *Behavioral Ecology and Sociobiology*, 61(2), 197–204.  
793 <https://doi.org/10.1007/s00265-006-0250-9>
- 794 Silk, J. B., Altmann, J., & Alberts, S. C. (2006). Social relationships among adult  
795 female baboons (*papio cynocephalus*) I. Variation in the strength of social  
796 bonds. *Behavioral Ecology and Sociobiology*, 61(2), 183–195.  
797 <https://doi.org/10.1007/s00265-006-0249-2>
- 798 Silk, J. B., Beehner, J. C., Bergman, T. J., Crockford, C., Engh, A. L., Moscovice,  
799 L. R., ... Cheney, D. L. (2009). The benefits of social capital: Close social  
800 bonds among female baboons enhance offspring survival. *Proceedings of*  
801 *the Royal Society B: Biological Sciences*, 276(1670), 3099–3104.  
802 <https://doi.org/10.1098/rspb.2009.0681>
- 803 Silk, J. B., Beehner, J. C., Bergman, T. J., Crockford, C., Engh, A. L., Moscovice,  
804 L. R., ... Cheney, D. L. (2010a). Female chacma baboons form strong,  
805 equitable, and enduring social bonds. *Behavioral Ecology and Sociobiology*,  
806 64(11), 1733–1747. <https://doi.org/10.1007/s00265-010-0986-0>
- 807 Silk, J. B., Beehner, J. C., Bergman, T. J., Crockford, C., Engh, A. L., Moscovice,  
808 L. R., ... Cheney, D. L. (2010b). Strong and consistent social bonds enhance  
809 the longevity of female baboons. *Current Biology*, 20(15), 1359–1361.



- 810 <https://doi.org/10.1016/j.cub.2010.05.067>
- 811 Smith, J. E. (2014). Hamilton's legacy: Kinship, cooperation and social tolerance  
812 in mammalian groups. *Animal Behaviour*, 92, 291–304.  
813 <https://doi.org/10.1016/j.anbehav.2014.02.029>
- 814 Spiegel, O., Sih, A., Leu, S. T., & Bull, C. M. (2018). Where should we meet?  
815 Mapping social network interactions of sleepy lizards shows sex-dependent  
816 social network structure. *Animal Behaviour*, 136, 207–215.  
817 <https://doi.org/10.1016/j.anbehav.2017.11.001>
- 818 Stanley, C. R., Mettke-Hofmann, C., Hager, R., & Shultz, S. (2018). Social  
819 stability in semiferrous ponies: networks show interannual stability alongside  
820 seasonal flexibility. *Animal Behaviour*, 136, 175–184.  
821 <https://doi.org/10.1016/j.anbehav.2017.04.013>
- 822 Stone, J., & Björklund, M. (2001). DELRIOUS: A computer program designed to  
823 analyse molecular marker data and calculate delta and relatedness  
824 estimates with confidence. *Molecular Ecology Notes*, 1(3), 209–212.  
825 <https://doi.org/10.1046/j.1471-8278.2001.00034.x>
- 826 Strickland, K., Gardiner, R., Schultz, A. J., & Frère, C. H. (2014). The social life of  
827 eastern water dragons: Sex differences, spatial overlap and genetic  
828 relatedness. *Animal Behaviour*, 97, 53–61.  
829 <https://doi.org/10.1016/j.anbehav.2014.08.009>
- 830 Strickland, K., Levengood, A., Foroughirad, V., Mann, J., Krzyszczyk, E., & Frère,  
831 C. H. (2017). A framework for the identification of long-term social avoidance  
832 in longitudinal datasets. *Royal Society Open Science*, 4(8).  
833 <https://doi.org/10.1098/rsos.170641>
- 834 Taberlet, P. (1996). Reliable genotyping of samples with very low DNA quantities  
835 using PCR. *Nucleic Acids Research*, 24(16), 3189–3194.  
836 <https://doi.org/10.1093/nar/24.16.3189>
- 837 Vasey, N. (2006). Impact of seasonality and reproduction on social structure,  
838 ranging patterns and fission–fusion social organization in red ruffed lemurs.  
839 In *Lemurs: ecology and adaptation* (pp. 275–305). New York:  
840 Springer/Kluwer.
- 841 Wahaj, S. A., Van Horn, R. C., Van Horn, T. L., Dreyer, R., Hilgrs, R., Schwarz,  
842 J., & Holekamp, K. E. (2004). Kin discrimination in the spotted hyena  
843 (*Crocuta crocuta*): Nepotism among siblings. *Behavioral Ecology and*  
844 *Sociobiology*, 56(3), 237–247. <https://doi.org/10.1007/s00265-004-0783-8>
- 845 Wey, T., Blumstein, D. T., Shen, W., & Jordán, F. (2008). Social network analysis  
846 of animal behaviour: a promising tool for the study of sociality. *Animal*  
847 *Behaviour*, 75(2), 333–344. <https://doi.org/10.1016/j.anbehav.2007.06.020>
- 848 Whitehead, H. (1996). Babysitting, dive synchrony, and indications of alloparental  
849 care in sperm whales. *Behavioral Ecology & Sociobiology*, 38(4), 237–244.
- 850 Whitehead, H. (2008). *Analyzing Animal Societies: Quantitative methods for*  
851 *vertebrate social analysis*. Chicago: University of Chicago Press.
- 852 Whitehead, H. (2009). SOCPROG programs: Analysing animal social structures.  
853 *Behavioral Ecology and Sociobiology*, 63(5), 765–778.  
854 <https://doi.org/10.1007/s00265-008-0697-y>
- 855 Wilkinson, G. S., Carter, G. G., Bohn, K. M., & Adams, D. M. (2016). Non-kin

856 cooperation in bats. *Philosophical Transactions of the Royal Society B:*  
857 *Biological Sciences*, 371(1687). <https://doi.org/10.1098/rstb.2015.0095>  
858 Wiszniewski, J., Allen, S. J., & Möller, L. M. (2009). Social cohesion in a  
859 hierarchically structured embayment population of Indo-Pacific bottlenose  
860 dolphins. *Animal Behaviour*, 77(6), 1449–1457.  
861 <https://doi.org/10.1016/j.anbehav.2009.02.025>  
862 Wright, P. C., Erhart, E. M., Tecot, S., Baden, A. L., Arrigo-nelson, S. J., Herrera,  
863 J., ... Zohdy, S. (2012). *Long-Term Field Studies of Primates*.  
864 <https://doi.org/10.1007/978-3-642-22514-7>
